# Supplementary material for: SLC7A5 Promotes Colorectal Cancer Progression by Regulating Cell Cycle and Migration
Source: Research Square preprint supplement (doi:10.21203/rs.3.rs-192581/v1), 2021-02-11
Supplement: Supplementary file 1 [file 485656a0f24131c2976350fd.docx]

**Supplemental Information**

**
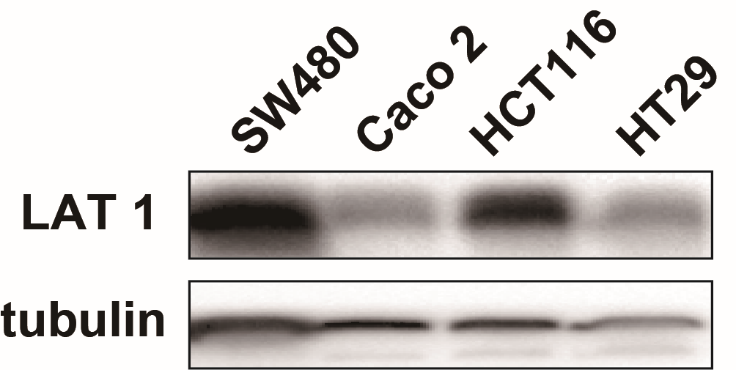
**

**Figure. S1.** Identification of the expression level of SLC7A5 in different colorectal cancer cells
